# Supplementary material
Source: PubMed Central journal article supplement (PMC4090762)
Supplement: NIHMS598974-supplement-520_2014_2285_MOESM1_ESM.pdf [file NIHMS598974-supplement-520_2014_2285_MOESM1_ESM.pdf]

Online Resource.

Search terms

---

| Prostate Cancer Terms                                                                                                                                                                     | AND | Cognitive Terms                                                                                                                                 | AND | ADT Terms                                                                                                                                                                                                                                            |
|-------------------------------------------------------------------------------------------------------------------------------------------------------------------------------------------|-----|-------------------------------------------------------------------------------------------------------------------------------------------------|-----|------------------------------------------------------------------------------------------------------------------------------------------------------------------------------------------------------------------------------------------------------|
| prostate cancer* OR<br>prostatic neoplasm* OR<br>(prostate* OR<br>prostatic)<br>AND<br>(cancer* OR<br>carcinoma OR<br>malignan* OR<br>neoplasm* OR<br>oncolog* OR<br>tumor*OR<br>tumour*) |     | cognition OR<br>cognition disorder* OR<br>cognitive OR<br>cognitive disorder* OR<br>cognitive impairment* OR<br>memory OR<br>neuropsychological |     | androgen OR<br>androgen deprivation OR<br>antineoplastic agents OR<br>antineoplastic agents, hormonal OR<br>chemical castration OR<br>GnRH OR<br>gonadotrophin OR<br>gonadotrophin-releasing hormone OR<br>hormone therapy OR<br>LHRH OR<br>lutening |

---

Limits: English AND human AND male

---

**Journal:** Supportive Care in Cancer

**Article Title:** Cognitive Functioning in Men Receiving Androgen Deprivation Therapy for Prostate Cancer: A Systematic Review and Meta-Analysis

**Authors:** Heather L. McGinty, M.A.<sup>1,2</sup>, Kristin M. Phillips, Ph.D.<sup>3</sup>, Heather S. L. Jim, Ph.D.<sup>2</sup>, Julie M. Cessna, M.A., MPH<sup>1,2</sup>, Yasmin Asvat, Ph.D.<sup>1,2</sup>, Mallory G. Cases, MPH<sup>2</sup>, Brent J. Small, Ph.D.<sup>1,2</sup>, & Paul B. Jacobsen, Ph.D.<sup>2</sup>

**Author Affiliations:**

<sup>1</sup>University of South Florida, Tampa, FL

<sup>2</sup>Moffitt Cancer Center, Tampa, FL

<sup>3</sup>James A. Haley Veterans' Hospital, Tampa, FL

**Corresponding Author:** Paul B. Jacobsen, Moffitt Cancer Center, 12902 Magnolia Drive, MRC-PSY, Tampa, FL 33612, Phone: 813-745-3862, Fax: 813-745-6225, Email: [paul.jacobsen@moffitt.org](mailto:paul.jacobsen@moffitt.org)
